1 **Exome-wide analysis of copy number variation shows association of the human leukocyte antigen**  
2 **region with asthma in UK Biobank**

3 **Katherine A. Fawcett<sup>1\*</sup>, German Demidov<sup>2</sup>, Nick Shrine<sup>1</sup>, Megan L Paynton<sup>1</sup>, Stephan Ossowski<sup>2</sup>,**  
4 **Ian Sayers<sup>3</sup>, Louise V. Wain<sup>1,4</sup>, Edward J. Hollox<sup>5</sup>**

5 1. Department of Health Sciences, University of Leicester, Leicester, LE1 7RH, UK

6 2. Institute of Medical Genetics and Applied Genomics, University of Tübingen, Tübingen,  
7 Germany

8 3. Translational Medical Sciences, NIHR Respiratory Biomedical Research Centre, School of  
9 Medicine, Biodiscovery Institute, University Park, University of Nottingham, Nottingham, UK.

10 4. National Institute for Health Research, Leicester Respiratory Biomedical Research Centre,  
11 Glenfield Hospital, Leicester, LE3 9QP, UK

12 5. Department of Genetics and Genome Biology, University of Leicester, UK

13 **\*Corresponding author: [kaf19@leicester.ac.uk](mailto:kaf19@leicester.ac.uk)**

14 **Abstract**

15 Background: The role of copy number variants (CNVs) in susceptibility to asthma is not well  
16 understood. This is, in part, due to the difficulty of accurately measuring CNVs in large enough  
17 sample sizes to detect associations. The recent availability of whole-exome sequencing (WES) in  
18 large biobank studies provides an unprecedented opportunity to study the role of CNVs in asthma.

19 Methods: We called common CNVs in 49,953 individuals in the first release of UK Biobank WES using  
20 ClinCNV software. CNVs were tested for association with asthma in a stage 1 analysis comprising  
21 7,098 asthma cases and 36,578 controls from the first release of sequencing data. Nominally-  
22 associated CNVs were then meta-analysed in stage 2 with an additional 17,280 asthma cases and  
23 115,562 controls from the second release of UK Biobank exome sequencing, followed by validation  
24 and fine-mapping.

25 Results: Five of 189 CNVs were associated with asthma in stage 2, including a deletion overlapping  
26 the *HLA-DQA1* and *HLA-DQB1* genes, a duplication of *CHROMR/PRKRA*, deletions within *MUC22* and  
27 *TAP2*, and a duplication in *FBRSL1*. The *HLA-DQA1*, *HLA-DQB1*, *MUC22* and *TAP2* genes all reside  
28 within the human leukocyte antigen (HLA) region on chromosome 6. *In silico* analyses demonstrated  
29 that the deletion overlapping *HLA-DQA1* and *HLA-DQB1* is likely to be an artefact arising from under-  
30 mapping of reads from non-reference HLA haplotypes, and that the *CHROMR/PRKRA* and *FBRSL1*  
31 duplications represent presence/absence of pseudogenes within the HLA region. Bayesian fine-  
32 mapping of the HLA region suggested that there are two independent asthma association signals.  
33 The variants with the largest posterior inclusion probability in the two credible sets were an amino  
34 acid change in *HLA-DQB1* (glutamine to histidine at residue 253) and a multi-allelic amino acid  
35 change in *HLA-DRB1* (presence/absence of serine, glycine or leucine at residue 11).

36 Conclusions: At least two independent loci characterised by amino acid changes in the *HLA-DQA1*,  
37 *HLA-DQB1* and *HLA-DRB1* genes are likely to account for association of SNPs and CNVs in this region

38 with asthma. The high divergence of haplotypes in the HLA can give rise to spurious CNVs, providing  
39 an important, cautionary tale for future large-scale analyses of sequencing data.

40 Keywords: Copy number variants, exome sequencing, UK Biobank, asthma, genetic association, fine-  
41 mapping, human leukocyte antigen

## 42 **Background**

43 Asthma is a chronic, inflammatory lung condition affecting over 300 million people worldwide. The  
44 proportion of population variance in asthma risk attributable to genetic variation has been  
45 estimated to be between 35 and 95% (1), and about 200 genetic loci have been associated with  
46 asthma (2). However, the variants discovered to date only account for a small proportion of  
47 heritability (2), and unmeasured genomic structural variants such as copy number variants (CNVs)  
48 may also contribute to genetic risk. Indeed, CNVs have been shown to play a role in a number of  
49 common, complex diseases and traits (3). There is strong evidence that CNVs are also important  
50 contributors to asthma risk (4-6), but to date there have been few reported associations with  
51 specific structural variants, including CNVs.

52 Previous studies of genome-wide CNVs in common, complex disease have detected CNVs using  
53 hybridisation-based techniques such as SNP genotyping arrays. However, these methods have  
54 limited genome coverage due to variability in SNP density, and only have the resolution to detect the  
55 largest CNVs reliably (7). The increasing availability of large high-throughput sequencing datasets  
56 offers an unprecedented opportunity to investigate a more comprehensive set of CNVs and other  
57 structural variants. The UK Biobank, a population-based cohort of half a million volunteer  
58 participants, released exome sequencing data on approximately 50,000 participants deliberately  
59 enriched for individuals with asthma in March 2019 (8). They released a second tranche of exome  
60 sequencing, including an additional approximately 150,000 individuals, at the end of 2020 (9). This  
61 resource allows researchers to detect exome-wide CNVs and test them for association with asthma,  
62 potentially identifying novel genetic drivers of asthma and new mechanistic insights at asthma-  
63 associated loci.

64 In this study, we detected CNVs affecting exons in 7,098 asthma cases and 36,578 controls from UK  
65 Biobank and tested them for association with asthma status. We then performed meta-analyses of  
66 asthma-associated CNVs from this first stage with and an additional set of 17,280 asthma cases and

67 115,562 controls from the second tranche of UK Biobank exome sequencing. *In silico* validation of  
68 CNVs demonstrating reproducible association with asthma was sought in publicly available datasets  
69 (including those with long-read sequencing data), and the causal role of validated CNVs in asthma  
70 was investigated.

71

## 72 **Methods**

### 73 **Study participants**

74 The UK Biobank study is described here: <https://www.ukbiobank.ac.uk/>. Participants were included  
75 in this study if they were in the first or second tranche of exome sequencing data (8, 9), were of  
76 genetically inferred European ancestry, and were not first- or second-degree relatives of anyone  
77 already selected for inclusion.

78 Individuals were defined as having asthma if they either self-reported doctor-diagnosed asthma  
79 (fields 6152 or 22127) or had an International Classification of Diseases (ICD)10 code for asthma  
80 (J45\* or J46\*) in hospital inpatient records. Individuals were defined as controls if they had no self-  
81 reported doctor-diagnosed asthma, no ICD10 code for asthma in hospital inpatient records, and did  
82 not report asthma in an interview with a nurse (field 20002). Cases and controls reporting chronic  
83 bronchitis or emphysema (fields 6152, 22128, or 22129) or with an ICD10 code for chronic bronchitis  
84 or emphysema in hospital inpatient records were excluded from the analysis.

85 The numbers of individuals remaining in the first and second tranche of exome sequencing data at  
86 each stage of selection are given in Figure 1.

### 87 **Exome sequencing**

88 Exome sequencing data was available from UK Biobank for 200,635 individuals (49,953 from the first  
89 release and an additional 150,682 from the second release). Exomes were captured using the IDT  
90 xGen Exome Research Panel v1.0 including supplemental probes prior to 75bp paired end

91 sequencing on the Illumina NovaSeq 6000 platform using S2 (first tranche) and S4 (additional  
92 samples in the second tranche) flow cells. For the first tranche of exome sequencing (our stage 1  
93 set) we used data from the March 2020 release of the UK Biobank exome data (8). These data had  
94 been processed using the SPB pipeline (8). For the second tranche of exome sequencing (our stage 2  
95 set) we used data from the December 2020 release processed using the OQFE protocol, which maps  
96 sequencing reads to the full GRCh38 reference version including all alternative contigs in an alt-  
97 aware manner (9).

### 98 **Copy number variant calling and genotyping**

99 Prior to CNV calling, we calculated read depth over exome capture regions from UK Biobank CRAM  
100 files using ngs-bits (<https://github.com/imgag/ngs-bits>) BedCoverage function and a minimum  
101 mapping quality of 5. We then used ClinCNV (<https://github.com/imgag/ClinCNV>) for the detection  
102 of medium to large ( $\geq 1$  exome capture region) germline CNVs, including deletions, duplications and  
103 multi-allelic CNVs, based on the principle of depth-of-coverage as described in Additional file 1.  
104 For each call, ClinCNV generated plots of normalised coverage colour-coded by copy number  
105 assignment. We performed manual inspection of each call to select those that exhibited distinct  
106 copy number clusters. CNVs were annotated using AnnotSV.

### 107 **Benchmarking**

108 It can be challenging to assess the accuracy of CNV callers due to the absence of truth sets within the  
109 tested cohort. However, we had previously directly measured copy number at the *CCL3L1* locus  
110 using paralogue ratio tests in a subset of approximately 5000 UK Biobank participants of European  
111 ancestry (10), with copy numbers ranging from 0 to 5. We compared the distribution of copy  
112 numbers in these ~5000 participants to the distribution of copy numbers inferred by ClinCNV in the  
113 49,953 participants from the first release of exome sequencing. For 412 individuals that were

114 genotyped in both studies, we also compared the genotypes from experimental studies with  
115 genotypes assigned by ClinCNV for the *CCL3L1* locus.

116 To assess false negative rates, we downloaded the structural variant calls from phase 3 of the 1000  
117 genomes project  
118 ([http://ftp.1000genomes.ebi.ac.uk/vol1/ftp/phase3/integrated\\_sv\\_map/supporting/GRCh38\\_positi](http://ftp.1000genomes.ebi.ac.uk/vol1/ftp/phase3/integrated_sv_map/supporting/GRCh38_positions/ALL.wgs.mergedSV.v8.20130502.svs.genotypes.GRCh38.vcf.gz)  
119 [ons/ALL.wgs.mergedSV.v8.20130502.svs.genotypes.GRCh38.vcf.gz](http://ftp.1000genomes.ebi.ac.uk/vol1/ftp/phase3/integrated_sv_map/supporting/GRCh38.vcf.gz)). We filtered these 1000  
120 genomes variants for copy number changes (SVTYPE = DEL, DUP, CNV, DEL\_ALU, DEL\_LINE1, or  
121 DEL\_SVA) with allele frequency in Europeans greater than 5%, and which overlapped one or more  
122 UK Biobank exome capture regions by at least 70%. We considered these 1000 genomes CNVs to  
123 have been called by ClinCNV in our UK Biobank cohort if the two calls shared alternative alleles with  
124 a frequency within 5% of each other.

## 125 **Statistical analysis**

126 We took a two-stage approach to identifying CNVs associated with asthma. We first performed an  
127 association analysis in individuals from the first tranche of exome sequencing (including 7,098  
128 asthma cases and 36,578 controls). This stage 1 set produced a long-list of CNVs nominally  
129 associated with asthma ( $P < 0.05$ ). We then meta-analysed this long-list of CNVs with additional  
130 samples from the second tranche of exome sequencing (stage 2) (including 17,280 asthma cases and  
131 115,562 controls). In the stage 2 meta-analysis we used a Bonferroni-corrected overall significance  
132 threshold of  $P < 2.65 \times 10^{-4}$ .

133 To test each copy number variant for association with asthma, logistic regression models were  
134 implemented in R, with copy number, sex, age at recruitment, squared age at recruitment, and the  
135 first twenty principal components of genome-wide SNP genotypes, measured using the UK Biobank  
136 Axiom Genotyping array (to correct for population structure) included as covariates. Conditional  
137 analyses were performed by including the variants of interest in the regression model as covariates.  
138 LocusZoom was used to generate region plots.

139 Sensitivity analyses were performed to assess whether the effect of CNVs on asthma risk was altered  
140 when allergies were excluded. Individuals with self-reported doctor-diagnosed hayfever, allergic  
141 rhinitis and eczema (field 6152) were excluded from cases and controls and the association analysis  
142 described above was repeated.

### 143 **Power calculations**

144 In stage 1, we had over 80% power to detect an odds ratio of 1.06 with a CNV with an alternate  
145 allele frequency of 0.3. Even for low frequency CNVs (alternate allele frequency of 0.05) we had  
146 over 80% power to detect an odds ratio of 1.13. Power calculations were carried out using Quanto.

### 147 ***In silico* validation of CNVs**

148 CNVs that showed association with asthma were followed up by visualising the read data in the  
149 Integrative Genomics Viewer (IGV) (Broad) and checking for related pseudogenes that might lead to  
150 spurious CNV calls in resources such as the NCBI gene database  
151 (<https://www.ncbi.nlm.nih.gov/gene/>). We also checked for the presence of the CNVs in studies  
152 that used alternative bioinformatics or experimental approaches to identify structural variants (11-  
153 13), and using public online repositories such as the Broad CNV Browser  
154 ([http://www.broadinstitute.org/software/genomestrip/mcnv\\_supplementary\\_data](http://www.broadinstitute.org/software/genomestrip/mcnv_supplementary_data)) (14), the  
155 Database of Genomic Variation (<http://dgv.tcag.ca/dgv/app/home>) and the genome aggregation  
156 database (<https://gnomad.broadinstitute.org/>). Specifically, if the CNVs we detected in UK Biobank  
157 overlapped a CNV of the same type that had a similar frequency in publicly available data then this  
158 was considered to be evidence that the CNV was real.

### 159 **HLA region fine-mapping**

160 For UK Biobank participants that had SNP data passing quality control (N = 487,409), we re-imputed  
161 classical HLA genotypes and constituent predicted amino acid changes within HLA genes. For  
162 imputation, we used IMPUTE2 v2.3.2, the UK Biobank haplotypes (Category 100319) as the input



163 and the T1DGC reference panel (containing haplotypes for 5,225 samples from the Type 1 Diabetes  
164 Genetics Consortium (T1DGC)) (15). These imputed genotypes were then used alongside imputed  
165 SNPs and CNVs of interest to fine-map the signals of genetic association within the HLA region using  
166 a Bayesian method (Susie) (16). We restricted fine-mapping to variants with a minor allele  
167 frequency greater than 1% within the UK Biobank cohort. Summary statistics from the logistic  
168 regression were passed to the `susie_rss` function with a variant correlation matrix generated using  
169 Plink v1.9. Default parameters were used for the Susie analysis. Association of HLA region variants  
170 was plotted using Locuszoom. While imputed amino acid changes were included in the fine-  
171 mapping, they were excluded from the plots (unless they were present in a credible set) as the  
172 presence/absence alleles for all variants in a codon are ascribed the same chromosomal position,  
173 which disrupts Locuszoom plotting.

174

## 175 **Results**

176 In the first tranche of UK Biobank exome sequencing (N = 49,953), we used ClinCNV software to call  
177 a total of 665 CNVs. Of these CNV calls, 189 showed distinct and well-separated clusters upon visual  
178 inspection. Benchmarking showed that ClinCNV calls a high proportion (62.5%) of the common CNVs  
179 present in phase 3 of the 1000 genomes project, and that it is capable of accurately inferring copy  
180 number at complex multi-allelic loci (Additional file 1: Supplementary Results and Figure S1,  
181 Additional file 2: Table S1 and S2).

## 182 **Testing CNVs for association with asthma**

183 After exclusion of non-European individuals and relatives, data were available for 7,098 cases and  
184 36,578 controls in the stage 1 cohort, and for 17,280 cases and 115,562 controls in the independent  
185 stage 2 cohort (Figure 1). Baseline characteristics for these cohorts are shown in Table 1.

186 [Table 1 is at the end of the manuscript.]

187 We tested 189 high-quality CNVs for association with asthma in the stage 1. Seventeen CNVs  
188 showed nominal association with asthma ( $P < 0.05$ ) (Table 2, Additional file 2: Tables S3 and S4) and  
189 were taken forward to stage 2.

190 [Table 2 is at the end of the manuscript.]

191 In a meta-analysis of stage 1 samples and the additional independent 17,752 cases and 115,562  
192 controls from the stage 2 cohort, we detected five CNVs associated with asthma at a Bonferroni-  
193 corrected P value threshold ( $P < 2.65 \times 10^{-4}$ ) (Table 2). Cluster plots are shown in Additional file 1:  
194 Figure S2. The CNV with the strongest association signal is predicted to encompass exons 3-5 of the  
195 *HLA-DQA1* gene and all of the *HLA-DQB1* gene. These genes are adjacent to each other within the  
196 human leukocyte antigen (HLA) region on chromosome 6p21, and SNPs in these genes have been  
197 shown to be strongly associated with asthma (17-20).

198 Of the remaining replicated CNVs, two affect genes also residing in the HLA: a partial deletion of the  
199 large, central exon of *MUC22*, and a small deletion within the 3'UTR of *TAP2*. Genetic variants in the  
200 *MUC22* gene region (21, 22) and in *TAP2* (2) have been previously associated with asthma and  
201 asthma-related traits. The final two asthma-associated CNVs are partial gene duplications on  
202 chromosome 2 (affecting exons 4-8 of the *PRKRA* gene and the 3' end of the *CHROMR* long non-  
203 coding RNA gene) and chromosome 12 (affecting exon 2 of the *FBRSL1* gene). These genes have not,  
204 as far as we are aware, been genetically associated with asthma before.

205 All five asthma-associated CNVs showed consistent effect sizes in a sensitivity analysis that excluded  
206 cases and controls with common allergic conditions: *HLA-DQA1/HLA-DQB1* (0.87 [0.84-0.89],  $p =$   
207  $1.20 \times 10^{-24}$ ), *PRKRA* (1.13 [1.10-1.16],  $p = 4.25 \times 10^{-17}$ ), *MUC22* (1.04 [1.00-1.08],  $p = 0.048$ ), *TAP2*  
208 (1.09 [1.06-1.12],  $p = 3.12 \times 10^{-8}$ ), and *FBRSL1* (1.08 [1.04-1.12],  $p = 0.0001$ ).

209 **Validation and characterisation of asthma-associated CNVs**

210 To seek validation for our five CNVs associated with asthma and to identify putative breakpoints, we  
211 examined the mapped reads in the UK Biobank CRAM files using IGV and searched for our asthma-  
212 associated CNVs in publicly available short- and long-read sequencing results.

### 213 *MUC22 and TAP2*

214 Examination of the mapped reads in the UK Biobank CRAM files within the *MUC22* and *TAP22* CNV  
215 regions showed no reads in individuals genotyped as homozygous for the deletion, as expected  
216 (Additional file 1: Figure S3). The *MUC22* and *TAP2* deletions were identified in long-read data  
217 reported by Audano et al. (11) (hg38 coordinates chr6: 31026230-31027303 and chr6: 32827728-  
218 32827904 respectively) and in Chaisson et al. (12) (hg38 coordinates chr6: 31026229- 31027304 and  
219 chr6: 32827726-32827903 respectively), and in the 1000 genomes dataset (hg38 coordinates:  
220 31026238-31027306 and chr6:32827726-32827903 respectively). The allele frequency of the  
221 deletion in individuals of European ancestry from 1000 genomes (0.145 and 0.269 for *MUC22* and  
222 *TAP2* respectively) approximately matches the frequency amongst the UK Biobank participants  
223 (0.115 and 0.244 respectively, Additional file 1: Table S4). It is therefore likely that these CNV calls  
224 represent real deletions within the *MUC22* and *TAP2* genes.

### 225 *HLA-DQA1/HLA-DQB1*

226 The whole-exome sequencing data from individuals called as homozygous for the *HLA-DQA1/HLA-*  
227 *DQB1* deletion contained mapped reads within the reported CNV boundaries (Additional file 1:  
228 Figure S4). Mapped reads were also present within the reported CNV boundaries in pilot whole-  
229 genome sequencing (<https://biobank.ndph.ox.ac.uk/showcase/field.cgi?id=23183>) from the same  
230 individuals (Additional file 1: Figure S4). These reads exhibited greater sequence divergence from  
231 the primary reference sequence compared to the reads in individuals without the deletion, and  
232 divergent reads showed supplementary alignments to alternative chromosome 6 and HLA sequences  
233 within the full hg38 reference. HLA haplotypes show extremely high sequence divergence across the  
234 *DQA* and *DQB* genes (23). This high sequence divergence both from other haplotypes and the

235 reference sequence potentially limits mappability of sequencing reads from divergent haplotypes  
236 onto the reference genome, leading to underestimation of the number of reads derived from that  
237 region. The apparent deletion at this locus was therefore likely to be due to under-mapping of reads  
238 from reference-divergent HLA haplotypes.

239 To investigate this further, we imputed HLA alleles in UK Biobank and found that the *HLA-*  
240 *DQA1/DQB1* CNV was almost perfectly correlated with the *HLA-DQA1\*01* type (Spearman  
241 correlation = 0.97). Those without the deletion were homozygous for the *HLA-DQA1\*01* type and  
242 those heterozygous or homozygous for the deletion were heterozygous or homozygous for non-*HLA-*  
243 *DQA1\*01* types respectively.

244 This CNV was not found in publicly available long-read sequencing results. However, there is  
245 evidence for a CNV overlapping the *HLA-DQA1* and *HLA-DQB1* genes on the Broad CNV browser for  
246 the Handsaker et al. study (14) (CNV\_M1\_HG19\_6\_32603984\_32627361) but, as this call was based  
247 on read depth as well, it is likely to suffer from the same artefacts.

248 The artefactual nature of this CNV may account for the large departure of the genotype data from  
249 Hardy Weinberg Equilibrium (Additional file 2: Table S4).

#### 250 *CHROMR/PRKRA and FBRSL1*

251 Individuals with duplications in the *PRKRA* gene showed read pairs spanning exon-exon boundaries,  
252 whereas those without the duplication did not (Additional file 1: Figure S5). These exon-spanning  
253 reads also have secondary alignments to the alternative chromosome 6 and HLA sequences.

254 Previous work has shown that the HLA region DR53 haplotype contains an intronless,  
255 retrotransposed *PRKRA* pseudogene (also referred to as *PRKRAP1*) proximal to the *HLA-DRB7*  
256 pseudogene on GL000253v2\_alt and GL000256v2\_alt GRCh38 sequences (24). This suggests that the  
257 intron-spanning read-pairs mapping to *PRKRA* might actually arise from the pseudogene, resulting in  
258 an apparent increase in copy number of *PRKRA* in individuals carrying HLA haplotypes containing the

259 pseudogene. The association with asthma is therefore not necessarily with the *PRKRA* gene but  
260 potentially with HLA variation in linkage disequilibrium (LD) with the presence/absence of the  
261 pseudogene. The background noise of reads arising from the canonical *PRKRA* gene, on top of the  
262 reads arising from the pseudogene, probably accounts for why ClinCNV struggles to classify  
263 individuals into copy number bands at this locus (Additional file 1: Figure S2A). As can be seen in the  
264 cluster plots, some individuals clustering with the copy number of 4 group, are nonetheless assigned  
265 a copy number of 3, hence the large departure from Hardy-Weinberg Equilibrium (Additional file 2:  
266 Table S4).

267 Similarly, individuals with the *FBRSL1* gene duplication exhibit read pairs spanning exon boundaries  
268 (Additional file 1: Figure S5) and these reads map to alternative HLA sequences. A recent study  
269 identified a *FBRSL1* processed pseudogene on chromosome 6 (25), suggesting that this CNV also  
270 represents variation in the HLA region.

271 Further evidence that the *PRKRA* and *FBRSL1* signals are due to causal variation in the HLA region is  
272 provided by linkage disequilibrium and conditional analyses with HLA variants. Both CNVs were  
273 correlated with variation in the HLA region, but not their supposedly surrounding SNPs on  
274 chromosomes 2 and 12 respectively. The associations of *PRKRA* and *FBRSL1* CNVs with asthma were  
275 also abolished by conditioning on certain HLA variants (Additional file 2: Table S5). For example, the  
276 *PRKRA* CNV association was abolished by conditioning on various amino acid changes in the *HLA-*  
277 *DRB1*, *HLA-DQA1* and *HLA-DQB1* genes, and the *HLA-DQA1\*01* allelotype. Likewise, the *FBRSL1* CNV  
278 association was abolished by including *HLA-C\*07:01*, *HLA-B\*08* and *HLA-B\*08:01* types in the model,  
279 as well as amino acid changes in *HLA-C*, *HLA-B*, *HLA-DRB1*, *HLA-DQA1*, and *HLA-DQB1*.

## 280 **Fine-mapping the HLA region**

281 Having established that all our reproducible signals derive from the HLA region, we performed fine-  
282 mapping of this region using all imputed SNPs/indels (N = 19,891), imputed HLA alleles (N = 136) and  
283 amino acid changes (N = 835) with minor allele frequency greater than 1%, as well as the *MUC22*

284 CNV, the *TAP2* CNV and the presence of *PRKRA* and *FBRSL1* pseudogenes, in UK Biobank. Using a  
285 Bayesian fine-mapping method (Susie), we identified two credible sets over the *HLA-DRB1*, *HLA-*  
286 *DQA1*, and *HLA-DQB1* genes (Figure 2, credible set 1 variants shown in red circles and credible set 2  
287 variants shown in blue circles). The first set contained 66 variants and the variant with the largest  
288 posterior inclusion probability was rs1140343 (Additional file 2: Table S6), a missense change leading  
289 to substitution of a histidine for glutamine at residue 253 of *HLA-DQB1*. However, due to the large  
290 number of variants in this credible set, the top variant had a modest posterior inclusion probability  
291 of 0.082. Presence/absence of arginine at residue 55 was also in the top 5 variants with a posterior  
292 inclusion probability of 0.044, and this variant actually had the largest effect size and most significant  
293 p value (Additional file 2: Table S6). The second set contained 6 variants and the top variant, with a  
294 posterior inclusion probability of 0.555, was presence/absence of the amino acids serine, glycine or  
295 leucine at residue 11 in *HLA-DRB1*.

296 The variants in credible set 1 were amongst the most significantly associated with asthma (red  
297 circles in top panel of Figure 2), while the variants in credible set 2 do not reach genome-wide  
298 significance ( $P < 5 \times 10^{-8}$ , blue circles in top panel of Figure 2). However, when rs1140343 (the SNP  
299 with the top PIP in credible set 1) is added to the regression model, the variants in credible set 2 are  
300 amongst the most associated with asthma (bottom panel of Figure 2). There are two variants not  
301 present in credible set 2 that exhibit greater statistical association with asthma after adjustment for  
302 rs1140343. These variants show only modest correlation with the top variants from credible set 2 ( $r^2$   
303 = 0.496 and  $r^2 = 0.209$  respectively).

304 No CNV or pseudogene signals were part of these credible sets, suggesting that these are not the  
305 underlying causal variants.

306

307

308 **Discussion**

309 We have called CNVs using exome sequencing data in over 200,000 individuals from the UK Biobank  
310 study. Out of 189 putative CNV calls showing good separation between copy number clusters, five  
311 were reproducibly associated with asthma, including three deletions within the HLA region on  
312 chromosome 6, a duplication affecting the *CHROMR/PRKRA* genes on chromosome 2 and a  
313 duplication affecting the *FBRSL1* gene on chromosome 12. Visual inspection of mapped reads from  
314 exome sequencing and examination of publicly-available data showed that the CNV showing the  
315 strongest association with asthma, overlapping the *HLA-DQA1* and *HLA-DQB1* genes, was likely to be  
316 an artefact of under-mapping of reads from reference-divergent HLA haplotypes, and that the  
317 duplications affecting the *CHROMR/PRKRA* and *FBRSL1* genes were both likely to be artefacts of the  
318 polymorphic presence/absence of processed pseudogenes within the HLA region. Fine-mapping of  
319 imputed HLA variation and putative CNVs demonstrated that there are likely to be at least two real,  
320 independent, association signals for asthma within the HLA region, one involving primarily *HLA-*  
321 *DQA1* and *HLA-DQB1* variation and one involving primarily *HLA-DRB1* variation. The top variants  
322 within the credible sets are missense amino acid changes within the *HLA-DQB1* and *HLA-DRB1* genes  
323 respectively. The putative HLA CNVs were not present in either of the credible sets representing  
324 these signals, suggesting that they are not responsible for the association of HLA variation with  
325 asthma.

326 The HLA region has long been known to play an important role in asthma pathogenesis, presumably  
327 through the role of HLA genes in regulating immune processes. Indeed, the *HLA-DQ* locus was the  
328 first genetic locus to be associated with asthma (26). Since then, many genetic studies have  
329 identified associations between HLA genes and susceptibility to asthma (2, 18, 20, 27), as well as  
330 asthma subtypes (17, 19, 28, 29) and related traits such as serum IgE levels (30, 31). Our fine-  
331 mapping analysis suggest that there are at least two independent genetic risk loci for asthma within  
332 the HLA region. The first signal, represented by credible set 1, contains variants in and around the

333 *HLA-DQA1* and *HLA-DQB1* genes. The variant with the highest posterior inclusion probability in  
334 credible set 1 changes amino acid 253 (predicted to lie within the cytoplasmic domain) in the *DQB1*  
335 gene from glutamine to histidine. All the variants in credible set 1 are closely correlated and are also  
336 in linkage disequilibrium with previously reported asthma variants. For example, the Q253H amino  
337 acid change (rs1140343) is correlated with rs9273349, the *HLA-DQ* signal from the first GWAS of  
338 asthma (18) ( $r^2 = 0.813$ ). The variant with the highest posterior inclusion probability in credible set 2  
339 is presence/absence of the amino acids S, G, or L at residue 11. This residue is reported to lie in the  
340 P4 peptide binding pocket of *HLA-DRB1* (32) and amino acid changes at this position have previously  
341 been associated with autoimmune conditions such as rheumatoid arthritis, type 1 diabetes, and  
342 systemic lupus erythematosus (32-34). As far as we are aware, this variant is not well-correlated with  
343 previous asthma signals.

344 Detection of CNVs in large sequencing datasets such as the UK Biobank has only become feasible in  
345 the last few years and we will see increasing numbers of publications based on these data. In our  
346 study, the presence of pseudogenes in the HLA region led to apparent (artefactual) associations with  
347 regions on chromosome 2 and 12. Moreover, it is likely that the top CNV overlapping the *HLA-DQA1*  
348 and *HLA-DQB1* genes is an artefact of under-mapping of reads from reference-divergent HLA  
349 haplotypes. This demonstrates the pitfalls of using short-read sequencing to call CNVs and the  
350 importance of validating CNV calls in independent datasets.

351 We acknowledge several limitations of this study. First, we had over 80% power to detect modest  
352 effect sizes from common CNVs in our stage 1 analysis, but might have missed modest effect sizes  
353 from lower frequency CNVs (we had under 80% power to detect odds ratios of less than 1.13 for  
354 variants with allele frequency of 0.05). Second, our benchmarking suggested that at least 62.5% of  
355 common copy number variants from phase 3 of the 1000 genomes project were identified by our  
356 CNV calling algorithm. It is therefore possible that there are undetected CNV association signals for  
357 asthma. Third, some of our asthma-associated CNVs from the stage 1 analysis exhibited poor quality



358 genotyping in the stage 2 cohort and therefore lack of association of these CNVs should be  
359 interpreted cautiously. Fourth, we have not comprehensively assayed CNVs across the genome or  
360 frequency spectrum. Future work will include analysis of whole-genome sequencing data soon to be  
361 released by UK Biobank and identification of rare CNVs.

362

### 363 **Conclusions**

364 Our data suggests that common CNVs detectable from exome sequencing, and at least one exon in  
365 length, are unlikely to be as important for asthma susceptibility as SNP loci. All the asthma-  
366 associated CNVs identified in this study represent variation in the HLA region. We showed how the  
367 high divergence of haplotypes in the HLA region can give rise to spurious CNVs, providing an  
368 important, cautionary tale for future large-scale analyses of sequencing data. Fine-mapping the HLA  
369 region suggested that there are at least two asthma association signals in this region and that amino  
370 acid changes in *HLA-DQA1*, *HLA-DQB1* and *HLA-DRB1* genes are most likely to be the underlying  
371 causal variations.

372

### 373 **List of abbreviations**

374 CNV: Copy number variant

375 WES: Whole-exome sequencing

376 SNP: Single nucleotide polymorphism

377 IGV: Integrative Genomics Viewer

378 HLA: Human Leukocyte Antigen

379 T1DGC: Type 1 Diabetes Genetics Consortium

380

381 **Declarations**

382 *Ethics approval and consent to participate*

383 This study used anonymised data from UK Biobank, which comprises over 500,000 volunteer  
384 participants aged 40–69 years recruited across Great Britain between 2006 and 2010. The protocol  
385 and consent were approved by the UK Biobank’s Research Ethics Committee. Our analysis was  
386 conducted under approved UK Biobank data application number 56607.

387 *Consent for publication*

388 Not applicable.

389 *Availability of data and materials*

390 All data (summary statistics) generated or analysed during this study are included in this published  
391 article [and its supplementary information files]. The ClinCNV genotyping will be available to  
392 approved UK Biobank researchers as a returned dataset.

393 *Competing interests*

394 LVW has research funding (outside of submitted work) from GSK and Orion Pharma and consultancy  
395 for Galapagos. All other authors declare that they have no competing interests.

396 *Funding*

397 This work was supported by KF’s Asthma UK Fellowship (AUK-CDA-2019-414). The funding body had  
398 no role in the design of the study, the collection, analysis, and interpretation of data, or the writing  
399 of the manuscript. LVW is supported by a GSK / British Lung Foundation Chair in Respiratory  
400 Research (C17-1).

401 *Authors' contributions*

402 KAF was responsible for the design of the study, the acquisition of data under approved UK Biobank  
403 application 56607, the analysis and interpretation of the data, and the writing of the manuscript. GD  
404 created the ClinCNV software used to call and genotype CNVs, and also contributed to the analysis  
405 and interpretation of the data, and the writing of the manuscript. NS and MLP imputed HLA alleles  
406 in UK Biobank, used in conditional analyses and the fine-mapping part of this study. SO supervised  
407 GD to create the ClinCNV software. IS, LVW, and EJH contributed to the study design and  
408 interpretation of the results, and also the revision of the manuscript. All authors read and approved  
409 the final manuscript.

#### 410 *Acknowledgements*

411 We would like to acknowledge the UK Biobank and all the participants for generating this important  
412 health research resource. This study used the ALICE and SPECTRE High Performance Computing  
413 Facilities at the University of Leicester.

414

#### 415 **Additional files**

416 Additional file 1 (.docx) Supplementary Methods, Results and Figures. This file contains additional  
417 details of the ClinCNV method, additional details of benchmarking results, and Figures S1-5.

418 Additional file 2 (.xlsx) Supplementary Tables. This file includes Tables S1-6.

419 **References**

- 420 1. Ober C, Yao TC. The genetics of asthma and allergic disease: a 21st century perspective.  
421 *Immunol Rev.* 2011;242(1):10-30.
- 422 2. Valette K, Li Z, Bon-Baret V, Chignon A, Berube JC, Eslami A, et al. Prioritization of candidate  
423 causal genes for asthma in susceptibility loci derived from UK Biobank. *Commun Biol.* 2021;4(1):700.
- 424 3. Shaikh TH. Copy Number Variation Disorders. *Curr Genet Med Rep.* 2017;5(4):183-90.
- 425 4. Ferreira MA, McRae AF, Medland SE, Nyholt DR, Gordon SD, Wright MJ, et al. Association  
426 between ORMDL3, IL1RL1 and a deletion on chromosome 17q21 with asthma risk in Australia. *Eur J*  
427 *Hum Genet.* 2011;19(4):458-64.
- 428 5. Oliveira P, Costa GNO, Damasceno AKA, Hartwig FP, Barbosa GCG, Figueiredo CA, et al.  
429 Genome-wide burden and association analyses implicate copy number variations in asthma risk  
430 among children and young adults from Latin America. *Sci Rep.* 2018;8(1):14475.
- 431 6. Vishweswaraiah S, Veerappa AM, Mahesh PA, Jahromi SR, Ramachandra NB. Copy number  
432 variation burden on asthma subgenome in normal cohorts identifies susceptibility markers. *Allergy*  
433 *Asthma Immunol Res.* 2015;7(3):265-75.
- 434 7. Pinto D, Darvishi K, Shi X, Rajan D, Rigler D, Fitzgerald T, et al. Comprehensive assessment of  
435 array-based platforms and calling algorithms for detection of copy number variants. *Nat Biotechnol.*  
436 2011;29(6):512-20.
- 437 8. Van Hout CV, Tachmazidou I, Backman JD, Hoffman JD, Liu D, Pandey AK, et al. Exome  
438 sequencing and characterization of 49,960 individuals in the UK Biobank. *Nature.*  
439 2020;586(7831):749-56.
- 440 9. Szustakowski JD, Balasubramanian S, Sasson A, Khalid S, Bronson PG, Kvikstad E, et al.  
441 Advancing Human Genetics Research and Drug Discovery through Exome Sequencing of the UK  
442 Biobank. *medRxiv.* 2020.

- 443 10. Adewoye AB, Shrine N, Odenthal-Hesse L, Welsh S, Malarstig A, Jelinsky S, et al. Human  
444 CCL3L1 copy number variation, gene expression, and the role of the CCL3L1-CCR5 axis in lung  
445 function. *Wellcome Open Res.* 2018;3:13.
- 446 11. Audano PA, Sulovari A, Graves-Lindsay TA, Cantsilieris S, Sorensen M, Welch AE, et al.  
447 Characterizing the Major Structural Variant Alleles of the Human Genome. *Cell.* 2019;176(3):663-75  
448 e19.
- 449 12. Chaisson MJP, Sanders AD, Zhao X, Malhotra A, Porubsky D, Rausch T, et al. Multi-platform  
450 discovery of haplotype-resolved structural variation in human genomes. *Nat Commun.*  
451 2019;10(1):1784.
- 452 13. Sudmant PH, Rausch T, Gardner EJ, Handsaker RE, Abyzov A, Huddleston J, et al. An  
453 integrated map of structural variation in 2,504 human genomes. *Nature.* 2015;526(7571):75-81.
- 454 14. Handsaker RE, Van Doren V, Berman JR, Genovese G, Kashin S, Boettger LM, et al. Large  
455 multiallelic copy number variations in humans. *Nat Genet.* 2015;47(3):296-303.
- 456 15. Jia X, Han B, Onengut-Gumuscu S, Chen WM, Concannon PJ, Rich SS, et al. Imputing amino  
457 acid polymorphisms in human leukocyte antigens. *PLoS One.* 2013;8(6):e64683.
- 458 16. Zou Y, Carbonetto P, Wang G, Stephens M. Fine-mapping from summary data with the “Sum  
459 of Single Effects” model. *bioRxiv.* 2021.
- 460 17. Ferreira MAR, Mathur R, Vonk JM, Szwajda A, Brumpton B, Granell R, et al. Genetic  
461 Architectures of Childhood- and Adult-Onset Asthma Are Partly Distinct. *Am J Hum Genet.*  
462 2019;104(4):665-84.
- 463 18. Moffatt MF, Gut IG, Demenais F, Strachan DP, Bouzigon E, Heath S, et al. A large-scale,  
464 consortium-based genomewide association study of asthma. *N Engl J Med.* 2010;363(13):1211-21.
- 465 19. Pividori M, Schoettler N, Nicolae DL, Ober C, Im HK. Shared and distinct genetic risk factors  
466 for childhood-onset and adult-onset asthma: genome-wide and transcriptome-wide studies. *Lancet*  
467 *Respir Med.* 2019;7(6):509-22.

- 468 20. Shrine N, Portelli MA, John C, Soler Artigas M, Bennett N, Hall R, et al. Moderate-to-severe  
469 asthma in individuals of European ancestry: a genome-wide association study. *Lancet Respir Med*.  
470 2019;7(1):20-34.
- 471 21. Chen JB, Zhang J, Hu HZ, Xue M, Jin YJ. Polymorphisms of TGFB1, TLE4 and MUC22 are  
472 associated with childhood asthma in Chinese population. *Allergol Immunopathol (Madr)*.  
473 2017;45(5):432-8.
- 474 22. Yatagai Y, Hirota T, Sakamoto T, Yamada H, Masuko H, Kaneko Y, et al. Variants near the HLA  
475 complex group 22 gene (HCG22) confer increased susceptibility to late-onset asthma in Japanese  
476 populations. *J Allergy Clin Immunol*. 2016;138(1):281-3 e13.
- 477 23. Horton R, Gibson R, Coghill P, Miretti M, Allcock RJ, Almeida J, et al. Variation analysis and  
478 gene annotation of eight MHC haplotypes: the MHC Haplotype Project. *Immunogenetics*.  
479 2008;60(1):1-18.
- 480 24. Chida S, Hohjoh H, Hirai M, Tokunaga K. Haplotype-specific sequence encoding the protein  
481 kinase, interferon-inducible double-stranded RNA-dependent activator in the human leukocyte  
482 antigen class II region. *Immunogenetics*. 2001;52(3-4):186-94.
- 483 25. Feng X, Li H. Higher Rates of Processed Pseudogene Acquisition in Humans and Three Great  
484 Apes Revealed by Long-Read Assemblies. *Mol Biol Evol*. 2021;38(7):2958-66.
- 485 26. Marsh DG, Meyers DA, Bias WB. The epidemiology and genetics of atopic allergy. *N Engl J*  
486 *Med*. 1981;305(26):1551-9.
- 487 27. Suarez-Pajes E, Diaz-Garcia C, Rodriguez-Perez H, Lorenzo-Salazar JM, Marcelino-Rodriguez I,  
488 Corrales A, et al. Targeted analysis of genomic regions enriched in African ancestry reveals novel  
489 classical HLA alleles associated with asthma in Southwestern Europeans. *Sci Rep*. 2021;11(1):23686.
- 490 28. Esmailzadeh H, Nabavi M, Amirzargar AA, Aryan Z, Arshi S, Bermanian MH, et al. HLA-DRB  
491 and HLA-DQ genetic variability in patients with aspirin-exacerbated respiratory disease. *Am J Rhinol*  
492 *Allergy*. 2015;29(3):e63-9.

- 493 29. Yan Q, Forno E, Herrera-Luis E, Pino-Yanes M, Yang G, Oh S, et al. A genome-wide association  
494 study of asthma hospitalizations in adults. *J Allergy Clin Immunol.* 2021;147(3):933-40.
- 495 30. Daya M, Cox C, Acevedo N, Boorgula MP, Campbell M, Chavan S, et al. Multiethnic genome-  
496 wide and HLA association study of total serum IgE level. *J Allergy Clin Immunol.* 2021.
- 497 31. Vince N, Limou S, Daya M, Morii W, Rafaels N, Geffard E, et al. Association of HLA-DRB1  
498 \*09:01 with tIgE levels among African-ancestry individuals with asthma. *J Allergy Clin Immunol.*  
499 2020;146(1):147-55.
- 500 32. Furukawa H, Oka S, Shimada K, Hashimoto A, Tohma S. Human leukocyte antigen  
501 polymorphisms and personalized medicine for rheumatoid arthritis. *J Hum Genet.* 2015;60(11):691-  
502 6.
- 503 33. Hu X, Deutsch AJ, Lenz TL, Onengut-Gumuscu S, Han B, Chen WM, et al. Additive and  
504 interaction effects at three amino acid positions in HLA-DQ and HLA-DR molecules drive type 1  
505 diabetes risk. *Nat Genet.* 2015;47(8):898-905.
- 506 34. Molineros JE, Looger LL, Kim K, Okada Y, Terao C, Sun C, et al. Amino acid signatures of HLA  
507 Class-I and II molecules are strongly associated with SLE susceptibility and autoantibody production  
508 in Eastern Asians. *PLoS Genet.* 2019;15(4):e1008092.
- 509
- 510

511 **Figure 1. Number of UK Biobank participants meeting study selection criteria.** \*Asthma cases  
512 defined as having self-reported doctor-diagnosed asthma or an ICD10 code for asthma in hospital  
513 inpatient records. \*\*Controls defined as having no self-reported doctor-diagnosed asthma, no  
514 ICD10 code for asthma, and no self-reported asthma from nurse's interview.

515

516 **Figure 2. Association of HLA variants with asthma in UK Biobank.** Locuszoom plots of the HLA  
517 region showing association of HLA region variants with asthma (top panel) and association of HLA  
518 region variants with asthma conditional on the SNP with the top posterior inclusion probability in  
519 credible set 1 (bottom panel). Variants in credible set 1 are highlighted in red and variants in  
520 credible set 2 are highlighted in blue.



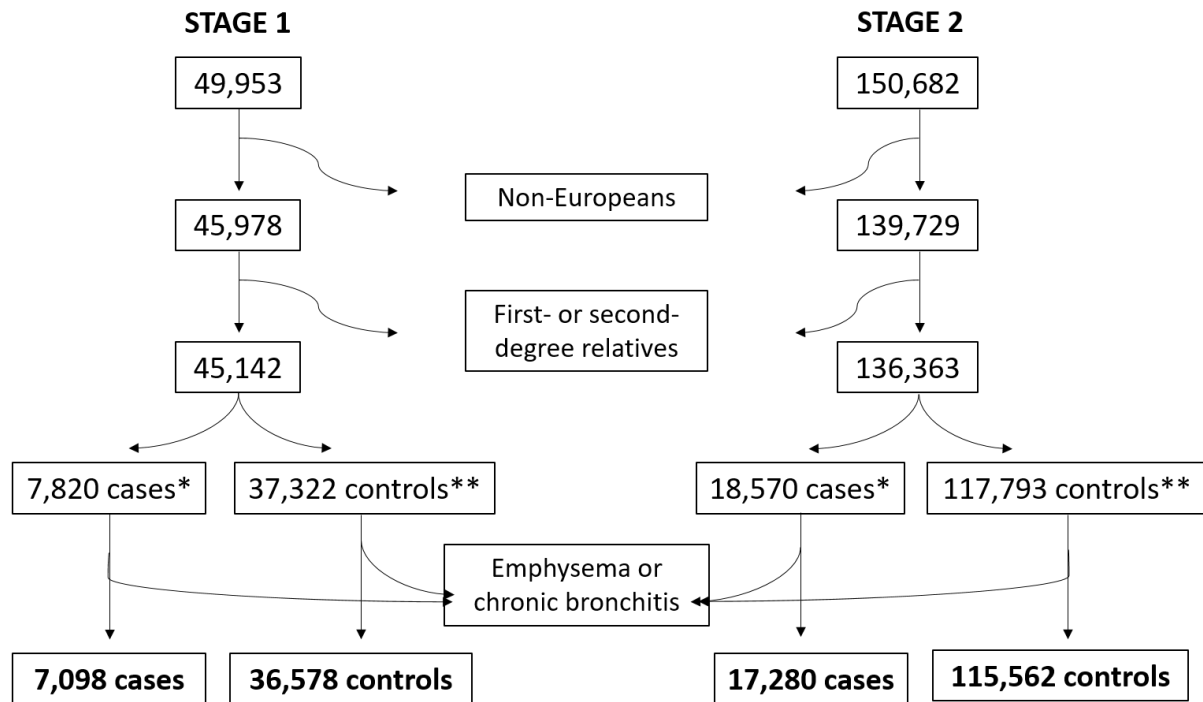

521

522

## Association of HLA variants with asthma

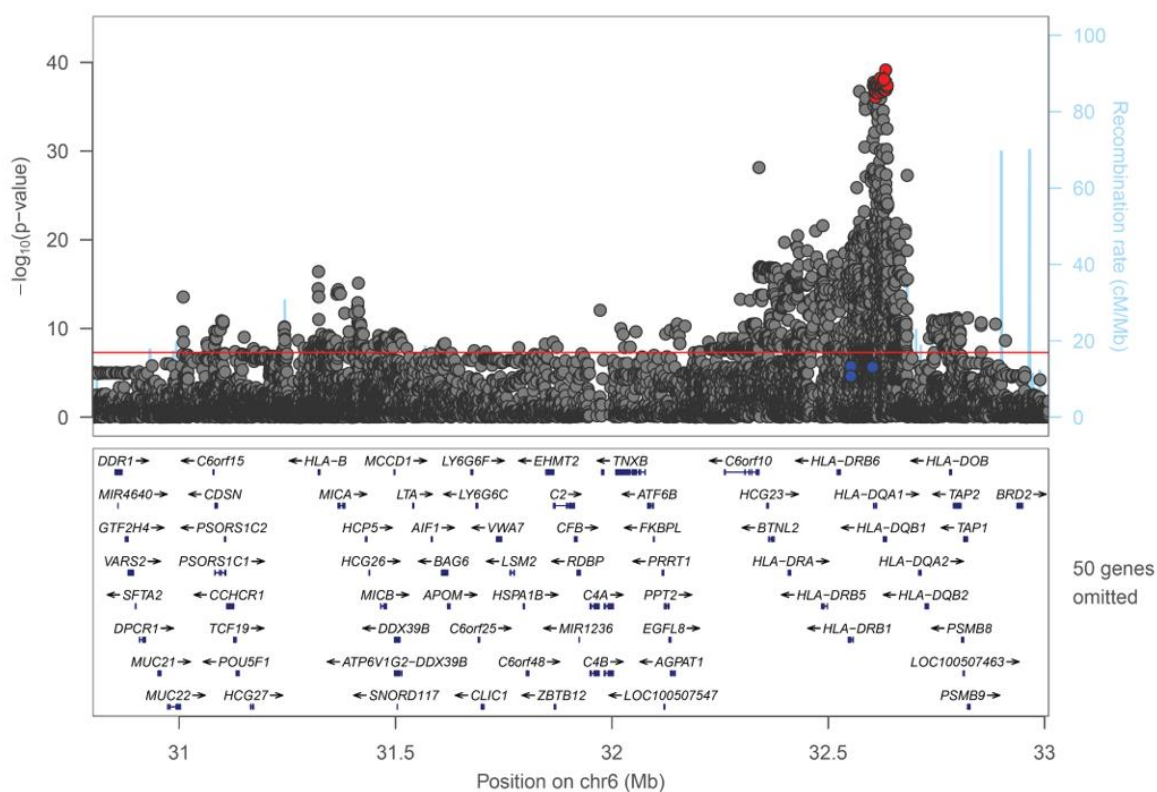

## Association of HLA variants with asthma conditional on rs1140343

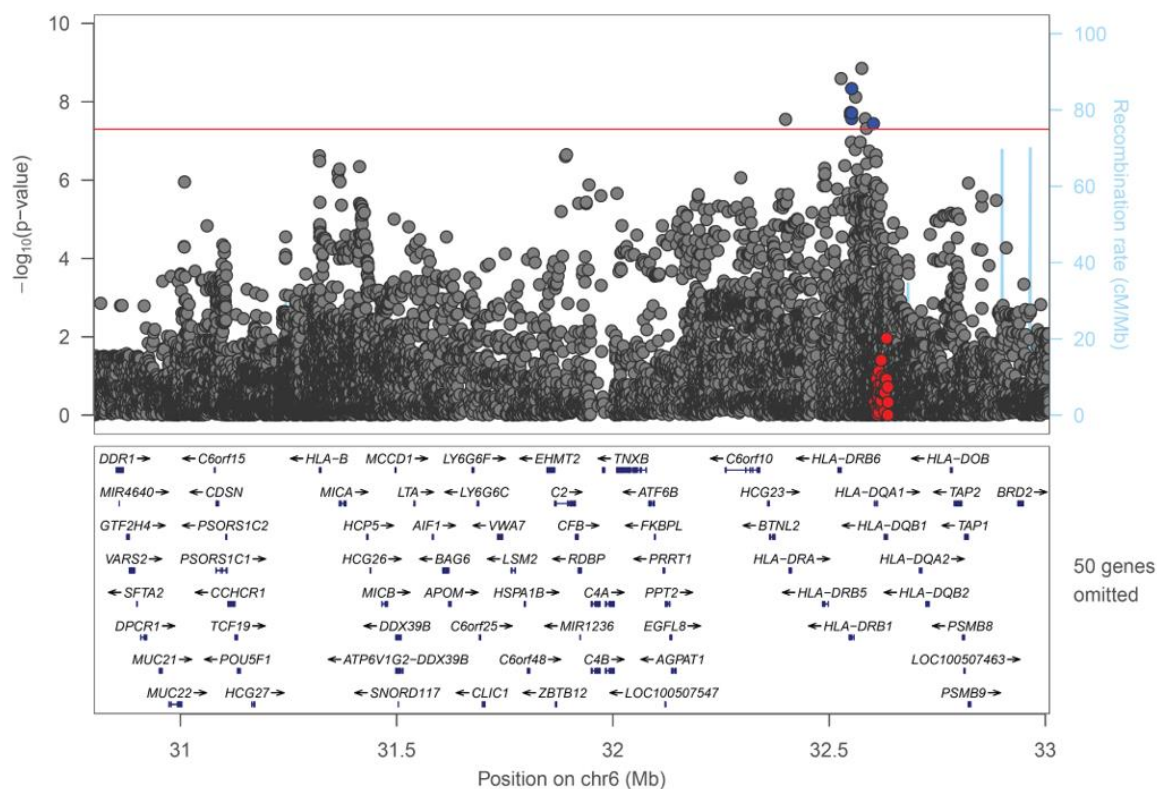

523

524

525 **Table 1. Baseline characteristics of stage 1 and stage 2 UK Biobank cohorts**

| Trait                                       | Stage 1           |                       | Stage 2            |                        |
|---------------------------------------------|-------------------|-----------------------|--------------------|------------------------|
|                                             | Cases (N = 7,098) | Controls (N = 36,578) | Cases (N = 17,280) | Controls (N = 115,562) |
| <b>Age at recruitment, years</b>            | 56 (8.09)         | 56.9 (7.89)           | 55.9 (8.23)        | 56.7 (8.02)            |
| <b>Female</b>                               | 4199 (59.2)       | 19561 (53.5)          | 10197 (59.0)       | 63424 (54.9)           |
| <b>Male</b>                                 | 2899 (40.8)       | 17017 (46.5)          | 7083 (41.0)        | 52138 (45.1)           |
| <b>FEV<sub>1</sub>, % predicted</b>         | 85.7 (16.6)       | 94.0 (14.3)           | 88.2 (15.3)        | 94.2 (14.1)            |
| <b>FEV<sub>1</sub>/FVC</b>                  | 0.733 (0.0778)    | 0.769 (0.0551)        | 0.741 (0.0709)     | 0.769 (0.0555)         |
| <b>Ever smoker</b>                          | 3093 (43.6)       | 16055 (43.9)          | 7590 (43.9)        | 50413 (43.6)           |
| <b>Never smoker</b>                         | 3901 (55.0)       | 20002 (54.7)          | 9357 (54.1)        | 63253 (54.7)           |
| <b>Unknown</b>                              | 104 (1.5)         | 521 (1.4)             | 333 (1.9)          | 1896 (1.6)             |
| <b>Hayfever, rhinitis or eczema status:</b> |                   |                       |                    |                        |
| <b>Yes</b>                                  | 3483 (49.1)       | 8228 (22.5)           | 7727 (44.7)        | 23269 (20.1)           |
| <b>No</b>                                   | 3615 (50.9)       | 28350 (77.5)          | 9553 (55.3)        | 92293 (79.9)           |

526 Data are mean (SD) or N (%), FEV<sub>1</sub> = forced expiratory volume in 1 second, FVC = forced vital capacity

**Table 2. Association of copy number variants with risk of asthma in UK Biobank**

| Chrom | Start     | End       | Genes                                 | Stage 1 |           |                          | Meta-analysis stages 1 and 2 |           |                                |
|-------|-----------|-----------|---------------------------------------|---------|-----------|--------------------------|------------------------------|-----------|--------------------------------|
|       |           |           |                                       | OR      | 95% CI    | P value                  | OR                           | 95% CI    | P value                        |
| 1     | 16922018  | 16948926  | <i>CROCC</i>                          | 0.96    | 0.93-0.99 | 0.0222                   | 1.00                         | 0.98-1.01 | 0.6280                         |
| 1     | 120823308 | 120890315 | <i>NBPF26/PPIAL4A/RNVU1-19</i>        | 0.95    | 0.92-0.99 | 0.0121                   | 0.98                         | 0.96-1.00 | 0.1011                         |
| 2     | 178432096 | 178444500 | <i>CHROMR/PRKRA</i>                   | 1.18    | 1.14-1.23 | 1.54 x 10 <sup>-15</sup> | 1.13                         | 1.11-1.15 | <b>3.67 x 10<sup>-29</sup></b> |
| 5     | 71011274  | 71055457  | <i>GTF2H2/GTF2H2C/GTF2H2C_2/NAIP</i>  | 0.93    | 0.90-0.97 | 0.0014                   | 0.97                         | 0.95-1.00 | 0.0189                         |
| 5     | 139325439 | 139325662 | <i>MATR3</i>                          | 1.19    | 1.04-1.35 | 0.0100                   | 1.03                         | 0.96-1.11 | 0.3763                         |
| 6     | 31026054  | 31027714  | <i>MUC22</i>                          | 1.16    | 1.09-1.23 | 1.38 x 10 <sup>-6</sup>  | 1.07                         | 1.04-1.10 | <b>1.25 x 10<sup>-5</sup></b>  |
| 6     | 31995912  | 31996634  | <i>C4A/C4B/C4B_2/LOC110384692</i>     | 0.94    | 0.91-0.97 | 0.0005                   | 0.97                         | 0.95-0.99 | 0.0008                         |
| 6     | 32641971  | 32666607  | <i>HLA-DQA1/HLA-DQB1/HLA-DQB1-AS1</i> | 0.83    | 0.80-0.87 | 3.62 x 10 <sup>-19</sup> | 0.85                         | 0.83-0.86 | <b>1.95 x 10<sup>-57</sup></b> |
| 6     | 32827709  | 32828045  | <i>TAP2</i>                           | 1.10    | 1.06-1.15 | 4.67 x 10 <sup>-6</sup>  | 1.10                         | 1.07-1.12 | <b>4.60 x 10<sup>-16</sup></b> |
| 11    | 1242887   | 1243906   | <i>MUC5B/MUC5B-AS1</i>                | 1.15    | 1.02-1.29 | 0.0186                   | 1.15                         | 1.03-1.28 | 0.0117                         |
| 11    | 1250234   | 1251240   | <i>MUC5B</i>                          | 1.18    | 1.06-1.31 | 0.0026                   | 1.18                         | 1.07-1.31 | 0.0013                         |
| 12    | 52692420  | 52692880  | <i>KRT77</i>                          | 0.90    | 0.84-0.96 | 0.0010                   | 0.95                         | 0.92-0.99 | 0.0055                         |
| 12    | 132507235 | 132511952 | <i>FBRS1</i>                          | 1.08    | 1.03-1.14 | 0.0032                   | 1.08                         | 1.05-1.11 | <b>2.71 x 10<sup>-7</sup></b>  |
| 14    | 23965761  | 23965983  | <i>DHRS4</i>                          | 0.91    | 0.84-0.98 | 0.0121                   | 0.96                         | 0.92-1.00 | 0.0757                         |
| 16    | 20480572  | 20480700  | <i>ACSM2A</i>                         | 0.94    | 0.90-0.99 | 0.0207                   | 0.99                         | 0.96-1.01 | 0.2713                         |
| 19    | 49959359  | 49960938  | <i>SIGLEC11</i>                       | 1.15    | 1.01-1.30 | 0.0327                   | 1.06                         | 0.99-1.13 | 0.0906                         |
| 19    | 54825027  | 54842918  | KIR gene region*                      | 1.06    | 1.02-1.11 | 0.0067                   | 1.03                         | 1.01-1.06 | 0.0060                         |

\*KIR2DS1/KIR2DS2/KIR2DS3/KIR2DS4/KIR2DS5/KIR3DL1/KIR3DS1/LOC101928804/LOC102725023/LOC112268355
